# Supplementary material
Source: PubMed Central journal article supplement (PMC3022109)

**Non-metric Multi-Dimensional Scaling (nMDS) plot**  
of around-the-wound samples (F) with Staph/Pseudomonas/Strep removed

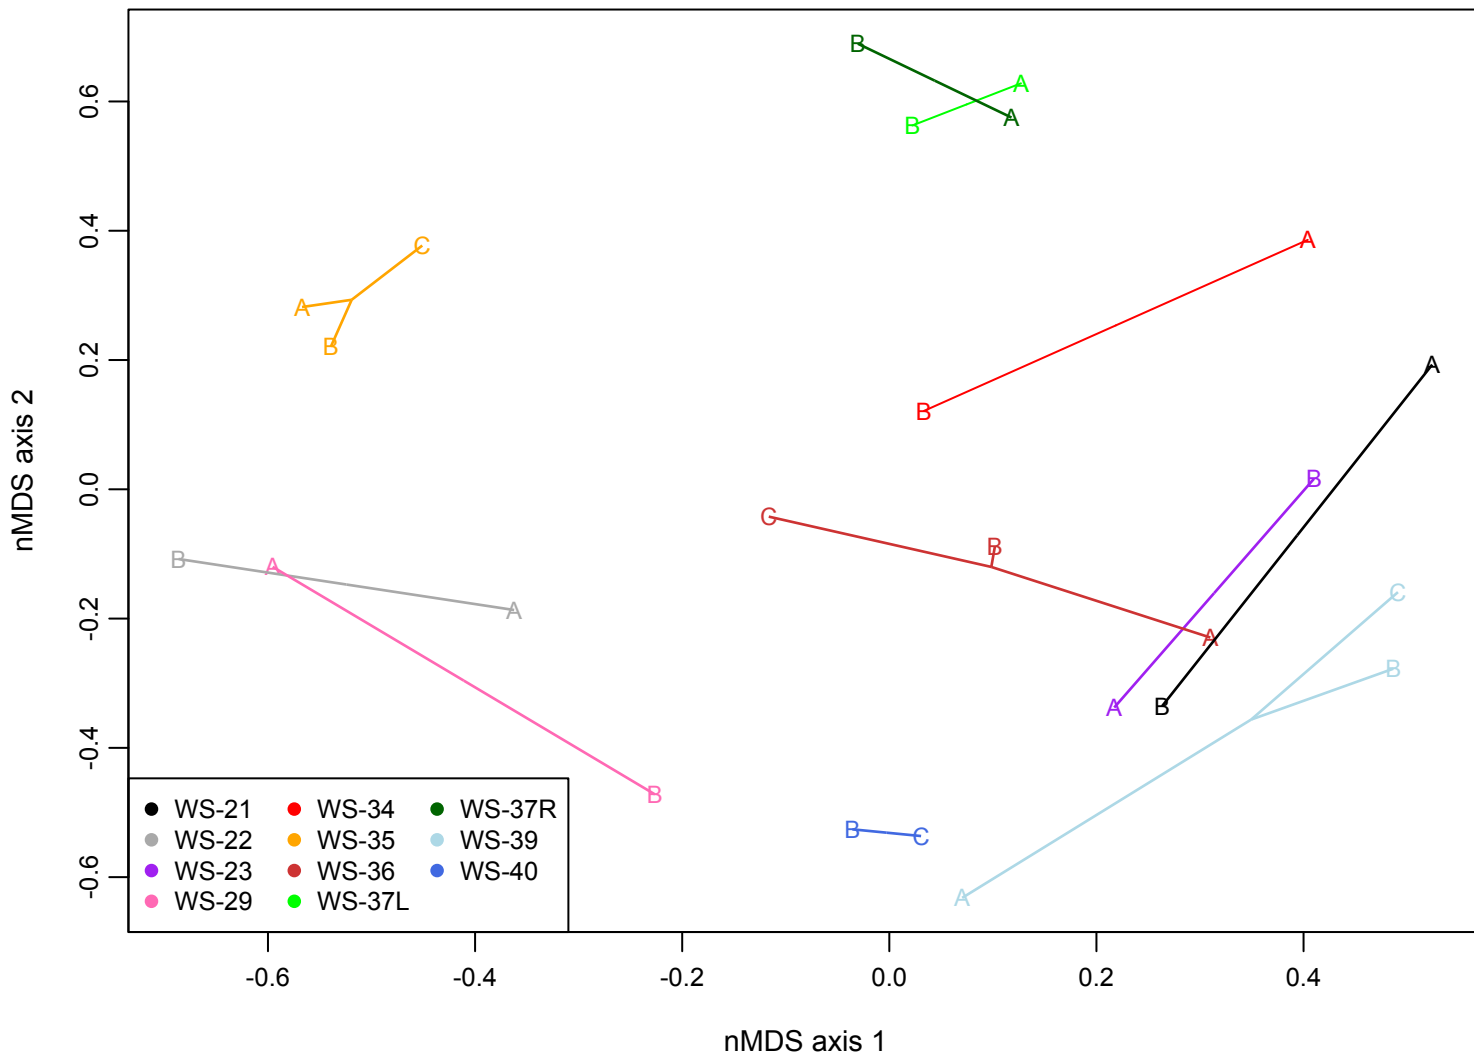

Supplement: NIHMS231220-supplement-Supp_Fig_S4.pdf [file NIHMS231220-supplement-Supp_Fig_S4.pdf]
