# Supplementary material
Source: PubMed Central journal article supplement (PMC3022109)

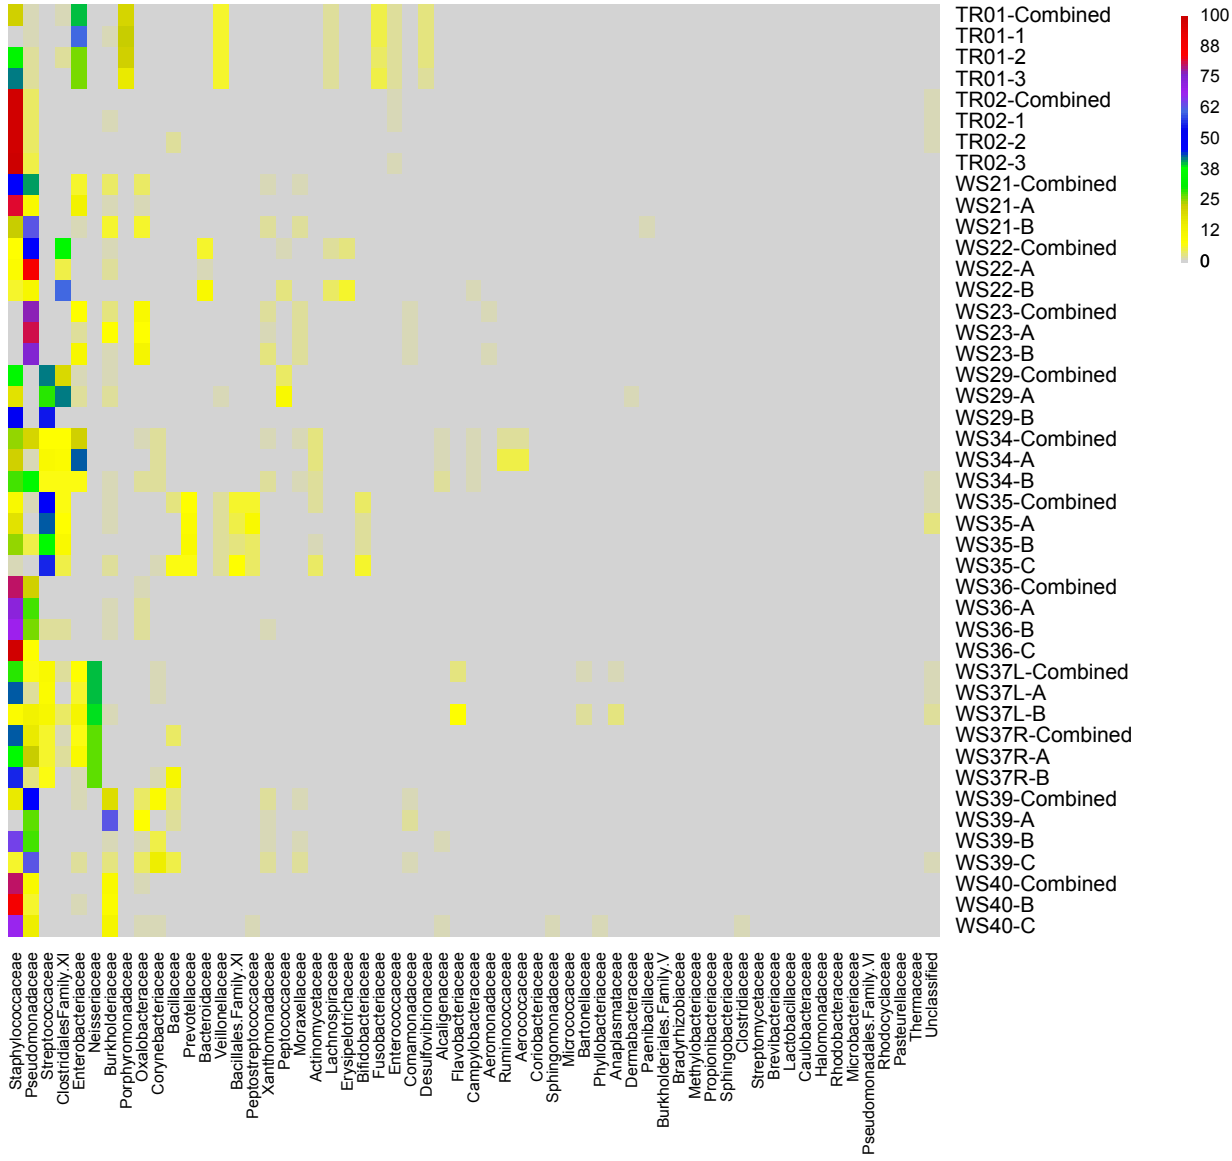

Supplement: NIHMS231220-supplement-Supp_Fig_S2.pdf [file NIHMS231220-supplement-Supp_Fig_S2.pdf]

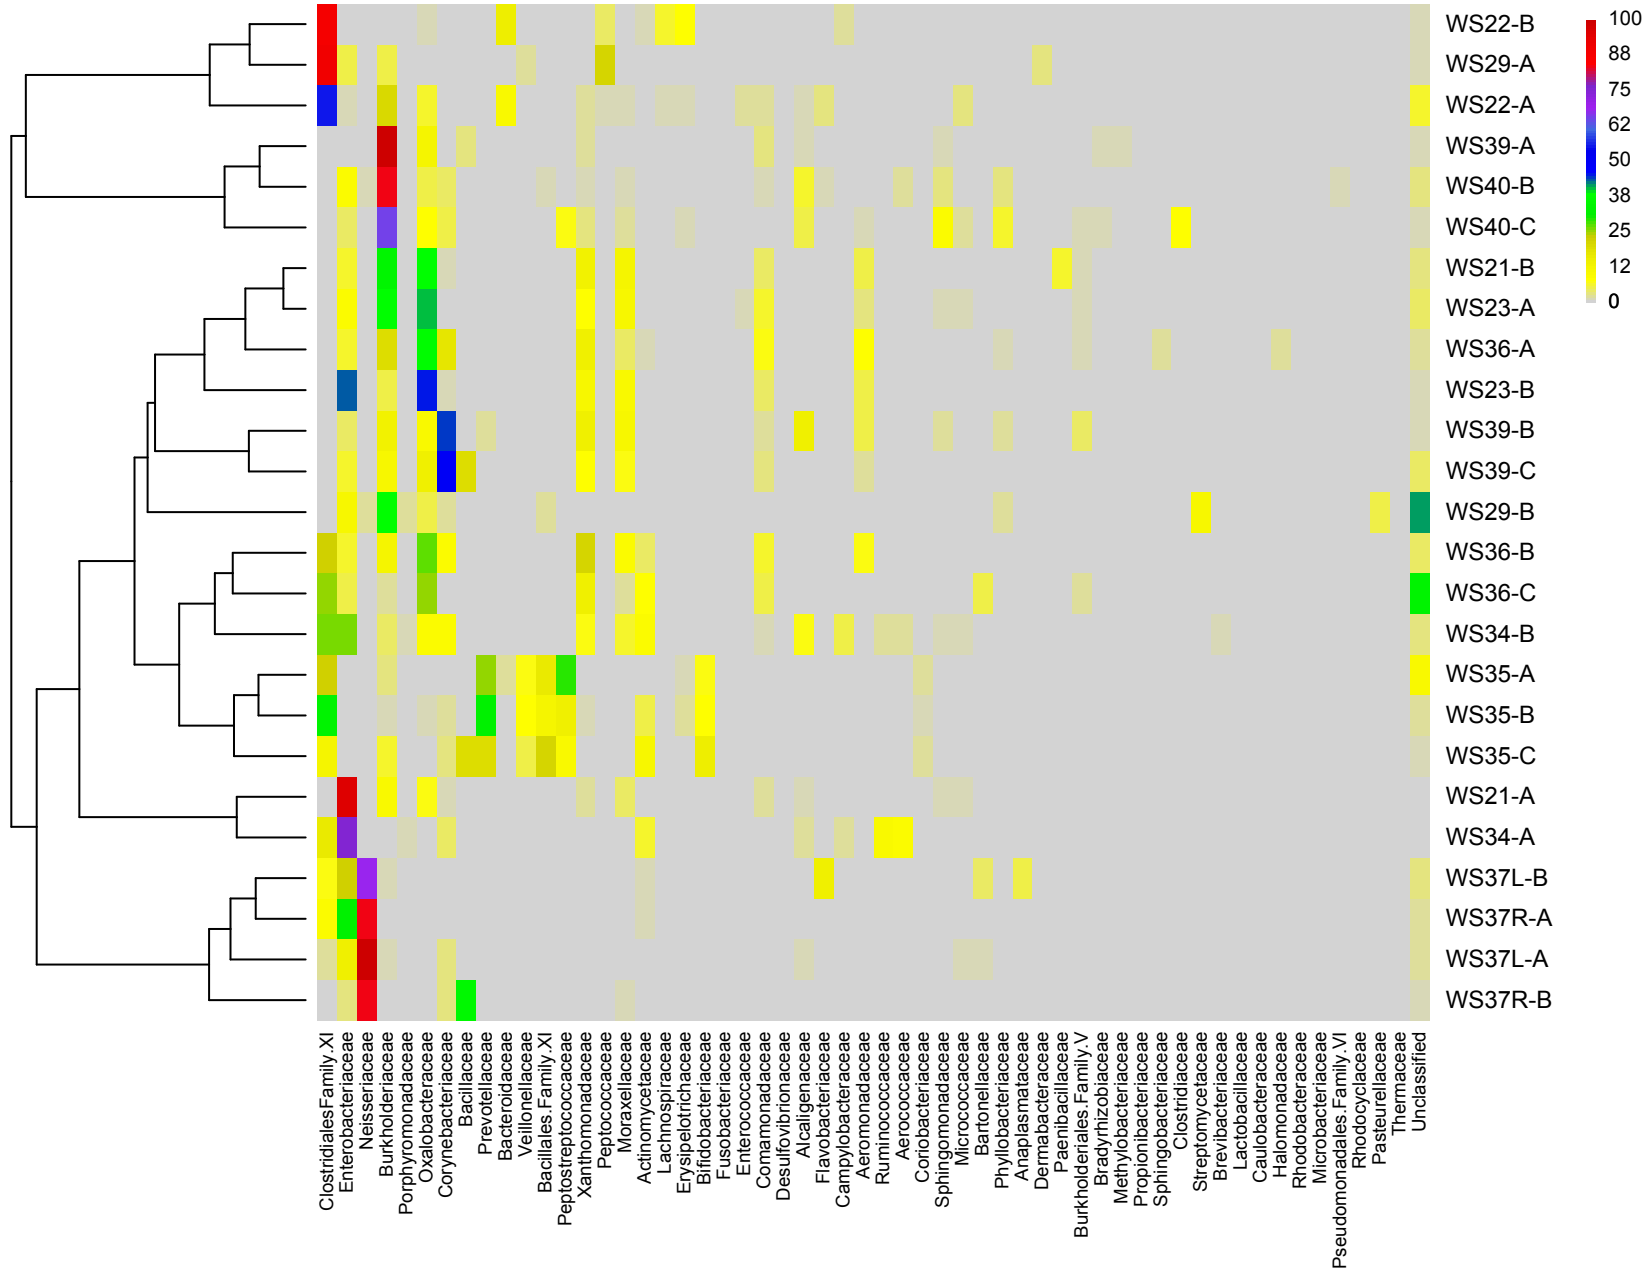

Supplement: NIHMS231220-supplement-Supp_Fig_S3.pdf [file NIHMS231220-supplement-Supp_Fig_S3.pdf]
